# Supplementary material
Source: Research Square preprint supplement (doi:10.21203/rs.3.rs-9472430/v1)
Supplement: Supplementary file 1 [file 4144e34cd79656ba35614800.pdf]

STROBE Statement—Checklist of items that should be included in reports of *cross-sectional studies*.

**Manuscript Title:** Antibiotic Use and Stewardship Gaps Among Fulani Women Dairy Vendors in Informal Dairy Markets, Sabon-gari and Zaria, Nigeria: A One Health Perspective

**Journal:** Bulletin of the World Health Organization

**Corresponding author:** Muhammad Muhsin Fathuddin

**Date:** April 2026

|                           | Item No | Recommendation                                                                                                                                                                       | Where reported                                                                                                                | ✓<br>/<br>✗ |
|---------------------------|---------|--------------------------------------------------------------------------------------------------------------------------------------------------------------------------------------|-------------------------------------------------------------------------------------------------------------------------------|-------------|
| <b>Title and abstract</b> | 1       | (a) Indicate the study's design with a commonly used term in the title or the abstract                                                                                               | Abstract — "cross-sectional survey" stated, p.4                                                                               | ✓           |
|                           |         | (b) Provide in the abstract an informative and balanced summary of what was done and what was found                                                                                  | Abstract — Methods, Findings, Conclusion, p.4                                                                                 | ✓           |
| <b>Introduction</b>       |         |                                                                                                                                                                                      |                                                                                                                               |             |
| Background/rationale      | 2       | Explain the scientific background and rationale for the investigation being reported                                                                                                 | Introduction, paragraphs 1–3, p.5-6                                                                                           | ✓           |
| Objectives                | 3       | State specific objectives, including any prespecified hypotheses                                                                                                                     | Introduction, final paragraph: "This study examines AMU practices..." p.7                                                     | ✓           |
| <b>Methods</b>            |         |                                                                                                                                                                                      |                                                                                                                               |             |
| Study design              | 4       | Present key elements of study design early in the paper                                                                                                                              | Methods — "Data collection": cross-sectional survey, p. 7                                                                     |             |
| Setting                   | 5       | Describe the setting, locations, and relevant dates, including periods of recruitment, exposure, follow-up, and data collection                                                      | Methods — Sabon Gari and Zaria markets, Kaduna State, p.7                                                                     | ✓           |
| Participants              | 6       | (a) Give the eligibility criteria, and the sources and methods of selection of participants                                                                                          | Methods — 77 itinerant Fulani women; convenience sampling; exclusion of packaged-product vendors stated, p.7                  | ✓           |
| Variables                 | 7       | Clearly define all outcomes, exposures, predictors, potential confounders, and effect modifiers. Give diagnostic criteria, if applicable                                             | Methods — "Data collection": five questionnaire sections defined (GI, Knowledge, Attitudes, Practices, Antibiotic use), p.7-8 | ✓           |
| Data sources/measurement  | 8*      | For each variable of interest, give sources of data and details of methods of assessment (measurement). Describe comparability of assessment methods if there is more than one group | Methods — structured questionnaire, Python, English/Hausa/Fulfulde, p.7                                                       | ✓           |
| Bias                      | 9       | Describe any efforts to address potential sources of bias                                                                                                                            | Methods — "Data analysis: neutral prompting, anonymous coding sentence], p.8-9                                                | ✓           |
| Study size                | 10      | Explain how the study size was                                                                                                                                                       | Methods — n=77; consistent with                                                                                               |             |

|                        |     |                                                                                                                                                                                                   |                                                                                                                                                                                         |   |
|------------------------|-----|---------------------------------------------------------------------------------------------------------------------------------------------------------------------------------------------------|-----------------------------------------------------------------------------------------------------------------------------------------------------------------------------------------|---|
|                        |     | arrived at                                                                                                                                                                                        | comparable KAP studies cited, p.7                                                                                                                                                       |   |
| Quantitative variables | 11  | Explain how quantitative variables were handled in the analyses. If applicable, describe which groupings were chosen and why                                                                      | Methods — "KAP scoring and categorisation": dichotomisation, Likert means, percentage scoring — most detailed of three manuscripts, p.9                                                 | ✓ |
| Statistical methods    | 12  | (a) Describe all statistical methods, including those used to control for confounding                                                                                                             | Methods — Data management/analysis: descriptive statistics, frequencies, percentages; chi-square and Fisher's exact tests described; p<0.05 threshold stated; Python (SciPy) used, p. 9 | ✓ |
|                        |     | (b) Describe any methods used to examine subgroups and interactions                                                                                                                               | Methods — cross-tabulations described, p.10                                                                                                                                             | ✓ |
|                        |     | (c) Explain how missing data were addressed                                                                                                                                                       | Methods — No-response categories were retained in all analyses and reported separately in supplementary tables S1-S5, p.9                                                               | ✓ |
|                        |     | (d) If applicable, describe analytical methods taking account of sampling strategy                                                                                                                | Methods — convenience sampling was employed, p.7                                                                                                                                        | ✓ |
|                        |     | (e) Describe any sensitivity analyses                                                                                                                                                             | Not applicable                                                                                                                                                                          | ✓ |
| <b>Results</b>         |     |                                                                                                                                                                                                   |                                                                                                                                                                                         |   |
| Participants           | 13* | (a) Report numbers of individuals at each stage of study—eg numbers potentially eligible, examined for eligibility, confirmed eligible, included in the study, completing follow-up, and analysed | Results — "General information": 77 completed, p.10-13                                                                                                                                  | ✓ |
|                        |     | (b) Give reasons for non-participation at each stage                                                                                                                                              | Results — 77 consented to participate and completed the survey; no questionnaires were excluded from analysis, p.10                                                                     | ✓ |
|                        |     | (c) Consider use of a flow diagram                                                                                                                                                                | Not applicable                                                                                                                                                                          |   |
| Descriptive data       | 14* | (a) Give characteristics of study participants (eg demographic, clinical, social) and information on exposures and potential confounders                                                          | Results — "General information": product types, education, training, milk sources, p.10-11                                                                                              | ✓ |
|                        |     | (b) Indicate number of participants with missing data for each variable of interest                                                                                                               | Results — Missing responses were minimal and are reported as no response categories in supplementary tables (S1–S5), p.10                                                               | ✓ |
| Outcome data           | 15* | Report numbers of outcome events or summary measures                                                                                                                                              | Results — Table 1: KAP categories; 0%/100%/71.4%, p.26                                                                                                                                  |   |
| Main results           | 16  | (a) Give unadjusted estimates and, if applicable, confounder-adjusted estimates and their precision (eg, 95% confidence interval). Make                                                           | Results — all proportions, Likert means, composite scores, p.11-12                                                                                                                      | ✓ |

|                          |    |                                                                                                                                                                            |                                                                                                                                                           |     |
|--------------------------|----|----------------------------------------------------------------------------------------------------------------------------------------------------------------------------|-----------------------------------------------------------------------------------------------------------------------------------------------------------|-----|
|                          |    | clear which confounders were adjusted for and why they were included                                                                                                       |                                                                                                                                                           |     |
|                          |    | (b) Report category boundaries when continuous variables were categorized                                                                                                  | Methods — "KAP scoring": good $\geq 80\%$ , moderate 50–79%, poor $< 50\%$ defined, p.9-10                                                                | ✓   |
|                          |    | (c) If relevant, consider translating estimates of relative risk into absolute risk for a meaningful time period                                                           | Not applicable                                                                                                                                            | N/A |
| Other analyses           | 17 | Report other analyses done—eg analyses of subgroups and interactions, and sensitivity analyses                                                                             | Results — Chi-square analyses of education level and training received against KAP outcome categories; all non-significant ( $p > 0.05$ ) reported, p. 13 | ✓   |
| <b>Discussion</b>        |    |                                                                                                                                                                            |                                                                                                                                                           |     |
| Key results              | 18 | Summarise key results with reference to study objectives                                                                                                                   | Discussion — first paragraph: 97.4% poor knowledge, 100% permissive, 71.4% poor practices, p.13                                                           | ✓   |
| Limitations              | 19 | Discuss limitations of the study, taking into account sources of potential bias or imprecision. Discuss both direction and magnitude of any potential bias                 | Limitations paragraph present in manuscript, p.15                                                                                                         | ✓   |
| Interpretation           | 20 | Give a cautious overall interpretation of results considering objectives, limitations, multiplicity of analyses, results from similar studies, and other relevant evidence | Discussion — all sub-sections, p13-15                                                                                                                     | ✓   |
| Generalisability         | 21 | Discuss the generalisability (external validity) of the study results, p.15                                                                                                | Limitations — convenience sampling restricts generalisability stated                                                                                      | ✓   |
| <b>Other information</b> |    |                                                                                                                                                                            |                                                                                                                                                           |     |
| Funding                  | 22 | Give the source of funding and the role of the funders for the present study and, if applicable, for the original study on which the present article is based              | Title page — No external funding, p.2                                                                                                                     | ✓   |

\*Give information separately for exposed and unexposed groups.

**Note:** An Explanation and Elaboration article discusses each checklist item and gives methodological background and published examples of transparent reporting. The STROBE checklist is best used in conjunction with this article (freely available on the Web sites of PLoS Medicine at <http://www.plosmedicine.org/>, Annals of Internal Medicine at <http://www.annals.org/>, and Epidemiology at <http://www.epidem.com/>). Information on the STROBE Initiative is available at [www.strobe-statement.org](http://www.strobe-statement.org).
