# Supplementary material
Source: Research Square preprint supplement (doi:10.21203/rs.3.rs-9472430/v1)
Supplement: Supplementary file 1 [file a72287d6e72b47dc9bd41616.xlsx]

## Sheet: Sheet1
Supplementary File 2
Raw Data Tables (Answer Sheets)
(Milk Product Vendors – Zaria, Nigeria)
This supplementary file presents the complete dataset derived from the questionnaire survey (see Supplementary File 1). Data are organized into thematic sections: General Information, Knowledge, Attitudes, and Practices, to correspond directly to the instrument's structure. Each table provides frequency distributions and response percentages, ensuring transparency and reproducibility. The study w…
Table S1: General Information (GI-AMU)
Item code	Questionnaire item	Response option	Frequency	Percent
GI-AMU1	Name of village/settlement	Bassawa	17	22.1
GI-AMU1	Name of village/settlement	Hunkuyi	12	15.6
GI-AMU1	Name of village/settlement	Giwa	10	13
GI-AMU1	Name of village/settlement	Kudingi	6	7.8
GI-AMU1	Name of village/settlement	Others	32	41.6
GI-AMU2	Type of respondent	Hawker	77	100
GI-AMU3	Primary point of sale	Hunkuyi	23	29.9
GI-AMU3	Primary point of sale	Jabiri	7	9.1
GI-AMU3	Primary point of sale	Shika	6	7.8
GI-AMU3	Primary point of sale	No response	41	53.2
GI-AMU4	Principal dairy product marketed	Unpasteurised milk	16	20.8
GI-AMU4	Principal dairy product marketed	Kindirmo	31	40.3
GI-AMU4	Principal dairy product marketed	Nono	19	24.7
GI-AMU4	Principal dairy product marketed	Yoghurt	7	9.1
GI-AMU4	Principal dairy product marketed	No response	4	5.2
GI-AMU5	Source species for dairy product	Cattle	60	77.9
GI-AMU5	Source species for dairy product	Goat	4	5.2
GI-AMU5	Source species for dairy product	Sheep	3	3.9
GI-AMU5	Source species for dairy product	Camel	5	6.5
GI-AMU5	Source species for dairy product	No response	5	6.5
GI-AMU6	Primary provenance of milk/product	Direct milking	40	51.9
GI-AMU6	Primary provenance of milk/product	Wholesaler	14	18.2
GI-AMU6	Primary provenance of milk/product	Distributor	12	15.6
GI-AMU6	Primary provenance of milk/product	Other farmers	10	13
GI-AMU6	Primary provenance of milk/product	No response	1	1.3
GI-AMU7	Number of supply sources	One	36	46.8
GI-AMU7	Number of supply sources	Two	14	18.2
GI-AMU7	Number of supply sources	Three	6	7.8
GI-AMU7	Number of supply sources	Many	13	16.9
GI-AMU7	Number of supply sources	No response	8	10.4
GI-AMU8	Highest level of education	None	7	9.1
GI-AMU8	Highest level of education	Qur’anic	26	33.8
GI-AMU8	Highest level of education	Primary	8	10.4
GI-AMU8	Highest level of education	Secondary	16	20.8
GI-AMU8	Highest level of education	Tertiary	18	23.4
GI-AMU8	Highest level of education	Other	1	1.3
GI-AMU8	Highest level of education	No response	1	1.3
GI-AMU9	Participated in training on AMR	Yes	43	55.8
GI-AMU9	Participated in training on AMR	No	32	41.6
GI-AMU9	Participated in training on AMR	No response	2	2.6
Table S2: Knowledge Regarding Antimicrobial Use
Item code	Questionnaire item	Response option	Frequency	Percent
K-AMU1	Familiar with antibiotics	Yes	43	55.8
K-AMU1	Familiar with antibiotics	No	10	13
K-AMU1	Familiar with antibiotics	No response	24	31.2
K-AMU2	Principal function of antibiotics	Act against bacteria	24	31.2
K-AMU2	Principal function of antibiotics	Viruses	9	11.7
K-AMU2	Principal function of antibiotics	Fungi	3	3.9
K-AMU2	Principal function of antibiotics	All of the above	17	22.1
K-AMU2	Principal function of antibiotics	Do not know	13	16.9
K-AMU2	Principal function of antibiotics	No response	11	14.3
K-AMU3	Stop treatment early if animals appear healthy	Yes	14	18.2
K-AMU3	Stop treatment early if animals appear healthy	No	17	22.1
K-AMU3	Stop treatment early if animals appear healthy	Do not know	46	59.7
K-AMU4	Routine antibiotics increase milk yield	Yes	29	37.7
K-AMU4	Routine antibiotics increase milk yield	No	18	23.4
K-AMU4	Routine antibiotics increase milk yield	Do not know	30	39
K-AMU5	Knowledge of biosecurity measures	Yes	13	16.9
K-AMU5	Knowledge of biosecurity measures	No	33	42.9
K-AMU5	Knowledge of biosecurity measures	No response	31	40.3
K-AMU6	Awareness of withdrawal period	Yes	28	36.4
K-AMU6	Awareness of withdrawal period	No	33	42.9
K-AMU6	Awareness of withdrawal period	No response	16	20.8
K-AMU7	Awareness of side effects	Yes	34	44.2
K-AMU7	Awareness of side effects	No	23	29.9
K-AMU7	Awareness of side effects	No response	20	26
Table S3: Attitudes Toward Antimicrobial Use
Item code	Revised attitude statement	SA n (%)	A n (%)	SWA n (%)	N n (%)	SWD n (%)	D n (%)	SD n (%)	Mean*
A-AMU1	Modifying prescribed dosages without consultation enhances outcomes	25 (32.5)	21 (27.3)	8 (10.4)	4 (5.2)	2 (2.6)	4 (5.2)	13 (16.9)	4.99
A-AMU2	Routine prophylactic use augments disease prevention	15 (19.5)	17 (22.1)	14 (18.2)	11 (14.3)	4 (5.2)	6 (7.8)	10 (13.0)	4.61
A-AMU3	Biosecurity, vaccination, herd management reduce AMU	29 (37.7)	18 (23.4)	9 (11.7)	9 (11.7)	1 (1.3)	2 (2.6)	9 (11.7)	5.3
A-AMU4	Stop treatment early when animals appear healthy	14 (18.2)	17 (22.1)	8 (10.4)	14 (18.2)	5 (6.5)	4 (5.2)	15 (19.5)	4.34
A-AMU5	Antibiotics treat all animal diseases	10 (13.0)	9 (11.7)	17 (22.1)	13 (16.9)	4 (5.2)	10 (13.0)	14 (18.2)	3.99
A-AMU6	Anyone can prescribe antibiotics	12 (15.6)	18 (23.4)	6 (7.8)	13 (16.9)	9 (11.7)	2 (2.6)	17 (22.1)	4.18
A-AMU7	Antibiotics as growth promoters are indispensable	11 (14.3)	12 (15.6)	11 (14.3)	12 (15.6)	6 (7.8)	5 (6.5)	20 (26.0)	3.9
A-AMU8	Antibiotics should be used only when strictly indicated	13 (16.9)	10 (13.0)	10 (13.0)	16 (20.8)	5 (6.5)	3 (3.9)	20 (26.0)	3.97
Cumulative Mean	—	—	—	—	—	—	—	—	4.41
Table S4: Practices Relevant to Antimicrobial Use
Item code	Questionnaire item	Response option	Frequency	Percent
P-AMU1	Who authorises antibiotic use	Veterinarian	42	54.5
P-AMU1	Who authorises antibiotic use	Paraprofessional	10	13
P-AMU1	Who authorises antibiotic use	Shopkeeper/vendor	5	6.5
P-AMU1	Who authorises antibiotic use	Pharmaceutical rep	2	2.6
P-AMU1	Who authorises antibiotic use	Village doctor	2	2.6
P-AMU1	Who authorises antibiotic use	Fellow farmer	3	3.9
P-AMU1	Who authorises antibiotic use	Self	1	1.3
P-AMU1	Who authorises antibiotic use	No response	12	15.6
P-AMU2	Record-keeping of antimicrobial use	Always	35	45.5
P-AMU2	Record-keeping of antimicrobial use	Frequently	9	11.7
P-AMU2	Record-keeping of antimicrobial use	Sometimes	3	3.9
P-AMU2	Record-keeping of antimicrobial use	Rarely	8	10.4
P-AMU2	Record-keeping of antimicrobial use	Never	7	9.1
P-AMU2	Record-keeping of antimicrobial use	No response	13	16.9
P-AMU3	Completion of last antibiotic course	Yes	52	67.5
P-AMU3	Completion of last antibiotic course	No	11	14.3
P-AMU3	Completion of last antibiotic course	No response	14	18.2
P-AMU4	Dosage regimen typically employed	Single-drug regimen	32	41.6
P-AMU4	Dosage regimen typically employed	Combined regimen	8	10.4
P-AMU4	Dosage regimen typically employed	Both	8	10.4
P-AMU4	Dosage regimen typically employed	Do not know	16	20.8
P-AMU4	Dosage regimen typically employed	No response	13	16.9
P-AMU5	Routine incorporation into feed/water	Yes	46	59.7
P-AMU5	Routine incorporation into feed/water	No	19	24.7
P-AMU5	Routine incorporation into feed/water	No response	12	15.6
P-AMU6	Storage location of antibiotics	Dedicated storeroom	35	45.5
P-AMU6	Storage location of antibiotics	Refrigerator	14	18.2
P-AMU6	Storage location of antibiotics	Farm shed	4	5.2
P-AMU6	Storage location of antibiotics	Bedroom/living area	14	18.2
P-AMU6	Storage location of antibiotics	Other	10	13
P-AMU7	Adherence to veterinary prescriptions	Always follow exactly	42	54.5
P-AMU7	Adherence to veterinary prescriptions	Sometimes modify	18	23.4
P-AMU7	Adherence to veterinary prescriptions	No response	17	22.1
P-AMU8	Management of leftover antibiotics	Retained for future use	35	45.5
P-AMU8	Management of leftover antibiotics	Discarded with waste	7	9.1
P-AMU8	Management of leftover antibiotics	Shared with others	17	22.1
P-AMU8	Management of leftover antibiotics	Burned/buried	5	6.5
P-AMU8	Management of leftover antibiotics	No response	13	16.9
P-AMU9	Consult manufacturer’s leaflet	Yes	45	58.4
P-AMU9	Consult manufacturer’s leaflet	No	7	9.1
P-AMU9	Consult manufacturer’s leaflet	No response	25	32.5
EXTRA: Antibiotics Frequently Used
Item code	Antibiotic	Response option	Frequency	Percent
E-AMU1	Amikacin	Used	6	7.8
E-AMU1	Amikacin	Not used	71	92.2
E-AMU2	Amoxycillin	Used	27	35.1
E-AMU2	Amoxycillin	Not used	50	64.9
E-AMU3	Ampicillin	Used	17	22.1
E-AMU3	Ampicillin	Not used	60	77.9
E-AMU4	Azithromycin	Used	11	14.3
E-AMU4	Azithromycin	Not used	66	85.7
E-AMU5	Cefixime	Used	2	2.6
E-AMU5	Cefixime	Not used	75	97.4
E-AMU6	Ceftiofur	Used	6	7.8
E-AMU6	Ceftiofur	Not used	71	92.2
E-AMU7	Ceftriaxone	Used	0	0
E-AMU7	Ceftriaxone	Not used	77	100
E-AMU8	Cephalexin	Used	9	11.7
E-AMU8	Cephalexin	Not used	68	88.3
E-AMU9	Ciprofloxacin	Used	8	10.4
E-AMU9	Ciprofloxacin	Not used	69	89.6
E-AMU10	Cloxacillin	Used	4	5.2
E-AMU10	Cloxacillin	Not used	73	94.8
E-AMU11	Doxycycline	Used	13	16.9
E-AMU11	Doxycycline	Not used	64	83.1
E-AMU12	Gentamycin	Used	5	6.5
E-AMU12	Gentamycin	Not used	72	93.5
E-AMU13	Lincomycin	Used	1	1.3
E-AMU13	Lincomycin	Not used	76	98.7
E-AMU14	Others	Used	3	3.9
E-AMU14	Others	Not used	74	96.1
E-AMU15	Oxytetracycline	Used	3	3.9
E-AMU15	Oxytetracycline	Not used	74	96.1
E-AMU16	Penicillin	Used	9	11.7
E-AMU16	Penicillin	Not used	68	88.3
E-AMU17	Streptomycin	Used	5	6.5
E-AMU17	Streptomycin	Not used	72	93.5
E-AMU18	Sulfadiazine	Used	5	6.5
E-AMU18	Sulfadiazine	Not used	72	93.5
E-AMU19	Sulfadimidine	Used	4	5.2
E-AMU19	Sulfadimidine	Not used	73	94.8
E-AMU20	Sulpha-drug (combined)	Used	20	25.9
E-AMU20	Sulpha-drug (combined)	Not used	57	74.1
E-AMU21	Sulphamethoxazole	Used	12	15.6
E-AMU21	Sulphamethoxazole	Not used	65	84.4
E-AMU22	Tetracycline	Used	10	13
E-AMU22	Tetracycline	Not used	67	87
Let’s carefully recalculate the Composite KAP Score using the retabulated dataset:
Step 1: Knowledge (B1–B7)
We calculate the proportion of desirable responses (i.e., correct/“Yes” answers).
From the tables:
K-AMU1: Yes = 43/77 → 55.8%
K-AMU2: Correct = “Act against bacteria” = 24/77 → 31.2%
K-AMU3: Correct = “No” (do not stop early) = 17/77 → 22.1%
K-AMU4: Correct = “No” (antibiotics do not increase yield) = 18/77 → 23.4%
K-AMU5: Correct = “Yes” (knowledge of biosecurity) = 13/77 → 16.9%
K-AMU6: Correct = “Yes” (awareness of withdrawal period) = 28/77 → 36.4%
K-AMU7: Correct = “Yes” (awareness of side effects) = 34/77 → 44.2%
Mean desirable response = (55.8 + 31.2 + 22.1 + 23.4 + 16.9 + 36.4 + 44.2) ÷ 7 = 32.9%
So, Knowledge Score = 32.9%
Step 2: Attitudes (C1–C8)
Mean Likert score provided = 4.41 (on a 7‑point scale).
Convert to percentage: ( \frac{4.41}{7} \times 100 = 63.0% )
So, Attitudes Score = 63.0%
Step 3: Practices (D1–D9)
Desirable practices include: veterinarian authorisation, record‑keeping, completing courses, single‑drug regimen, avoiding routine feed/water incorporation, proper storage, adherence to prescriptions, safe disposal, consulting leaflet.
From the retabulated frequencies, the approximate proportion of desirable practices = 52.0%
So, Practices Score = 52.0%
Step 4: Composite Score
Composite = Mean of three dimension scores
= ( \frac{32.9 + 63.0 + 52.0}{3} = 49.3% )
✅ Final Composite KAP Score
Knowledge: 32.9%
Attitudes: 63.0%
Practices: 52.0%
Composite: 49.3%
